# Supplementary material for: Integration of single-cell multiomic measurements across disease states with genetics identifies mechanisms of beta cell dysfunction in type 2 diabetes
Source: PubMed Central journal article supplement — bioRxiv. 2023 Jan 2:2022.12.31.522386. Preprint. [Version 1] doi: 10.1101/2022.12.31.522386 (PMC9881862; doi:10.1101/2022.12.31.522386), 2023-01-02
Supplement: NIHPP2022.12.31.522386V1-supplement-1.pdf [file NIHPP2022.12.31.522386V1-supplement-1.pdf]

1312 **Supplementary Figures**  
1313

Supplementary Figure 1

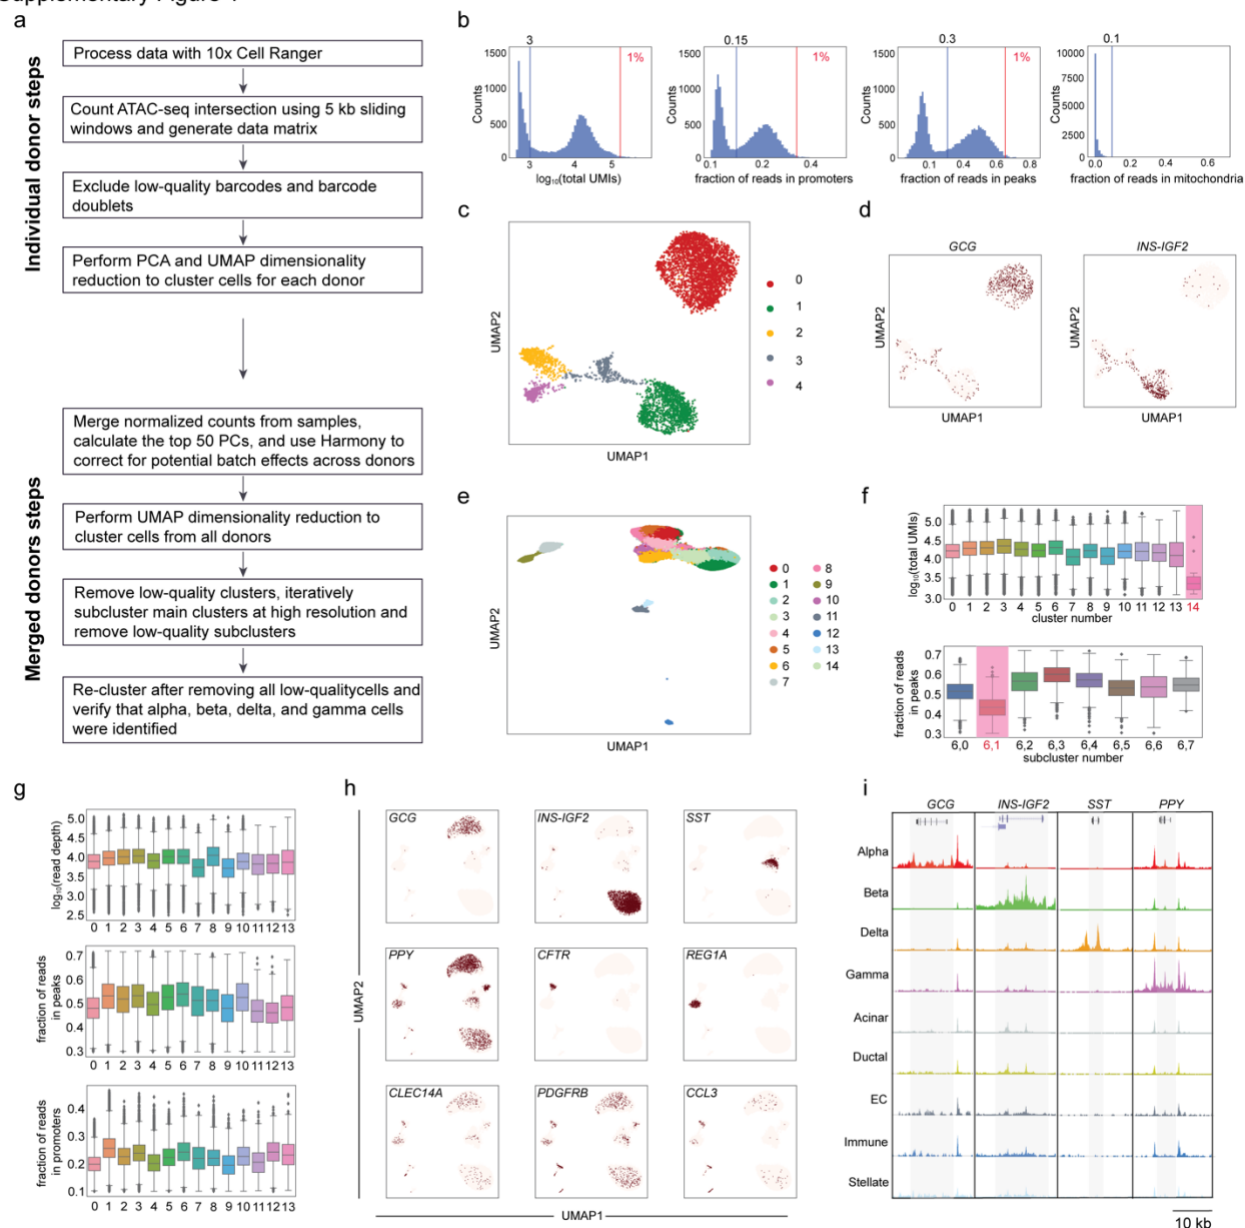

1314  
1315  
1316  
1317  
1318  
1319  
1320  
1321  
1322  
1323  
1324

**Supplementary Figure 1. Quality control of snATAC-seq data.**

**(a)** Steps for snATAC-seq data processing and quality control. **(b)** Representative quality control (QC) metrics for each donor.  $\log_{10}$  total UMIs, fraction of reads overlapping promoters, fraction of reads overlapping peaks, and fraction of reads overlapping mitochondria DNA distribution of cells from T2D donor JYH809 as example. Blue vertical lines denote thresholds of 1000 minimal fragment number, 15% fragments overlapping promoters, 30% fragments overlapping peaks, and 10% fraction of reads overlapping mitochondria DNA, respectively. Red vertical lines denote thresholds to identify top 1% barcodes with extremely high total fragment number and fraction of reads overlapping

1325 promoters and peaks, respectively. **(c)** Representative cell clustering from donor JYH809  
1326 conducted for each donor. Cells are plotted using the first two UMAP components. **(d)**  
1327 Promoter chromatin accessibility in a 5 kb window around TSS for endocrine marker  
1328 genes for each profiled cell from donor JYH809. Total counts normalization and log-  
1329 transformation were applied. **(e)** Cell clustering of chromatin accessibility profiles from all  
1330 donors. Cells are plotted using the first two UMAP components. **(f)** Representative low-  
1331 quality cluster and subcluster. Log<sub>10</sub> total UMIs distribution of cells from each cluster. Cells  
1332 in cluster 14 (top, highlighted in red) have significantly lower unique fragment than cells  
1333 in other clusters. Fraction of reads overlapping peaks distribution of cells from each  
1334 subcluster of main cluster 6. Cells in subcluster 1 (bottom, highlighted in red) have  
1335 significantly lower fraction of reads overlapping peaks than cells in other clusters. **(g)**  
1336 Log<sub>10</sub> total UMIs, fraction of reads overlapping peaks and fraction of reads in promoters  
1337 of cells from each cluster in Figure 1b, showing that these metrics do not drive single-cell  
1338 grouping in UMAP space. **(h)** Promoter chromatin accessibility in a 5 kb window around  
1339 TSS for selected endocrine and non-endocrine marker genes for each profiled cell (alpha:  
1340 *GCG*, beta: *INS-IGF2*, delta: *SST*, gamma: *PPY*, acinar: *REG1A*, ductal: *CFTR*, stellate:  
1341 *PDGFRB*, endothelial: *CLEC14A*, immune: *CCL3*). Total counts normalization and log-  
1342 transformation were applied. **(i)** Genome browser tracks showing aggregate read density  
1343 (scaled to uniform  $1 \times 10^6$  read depth) for cells within each cell type cluster at hormone  
1344 gene loci for endocrine islet cell types. The gene body of each gene is highlighted.

Supplementary Figure 2

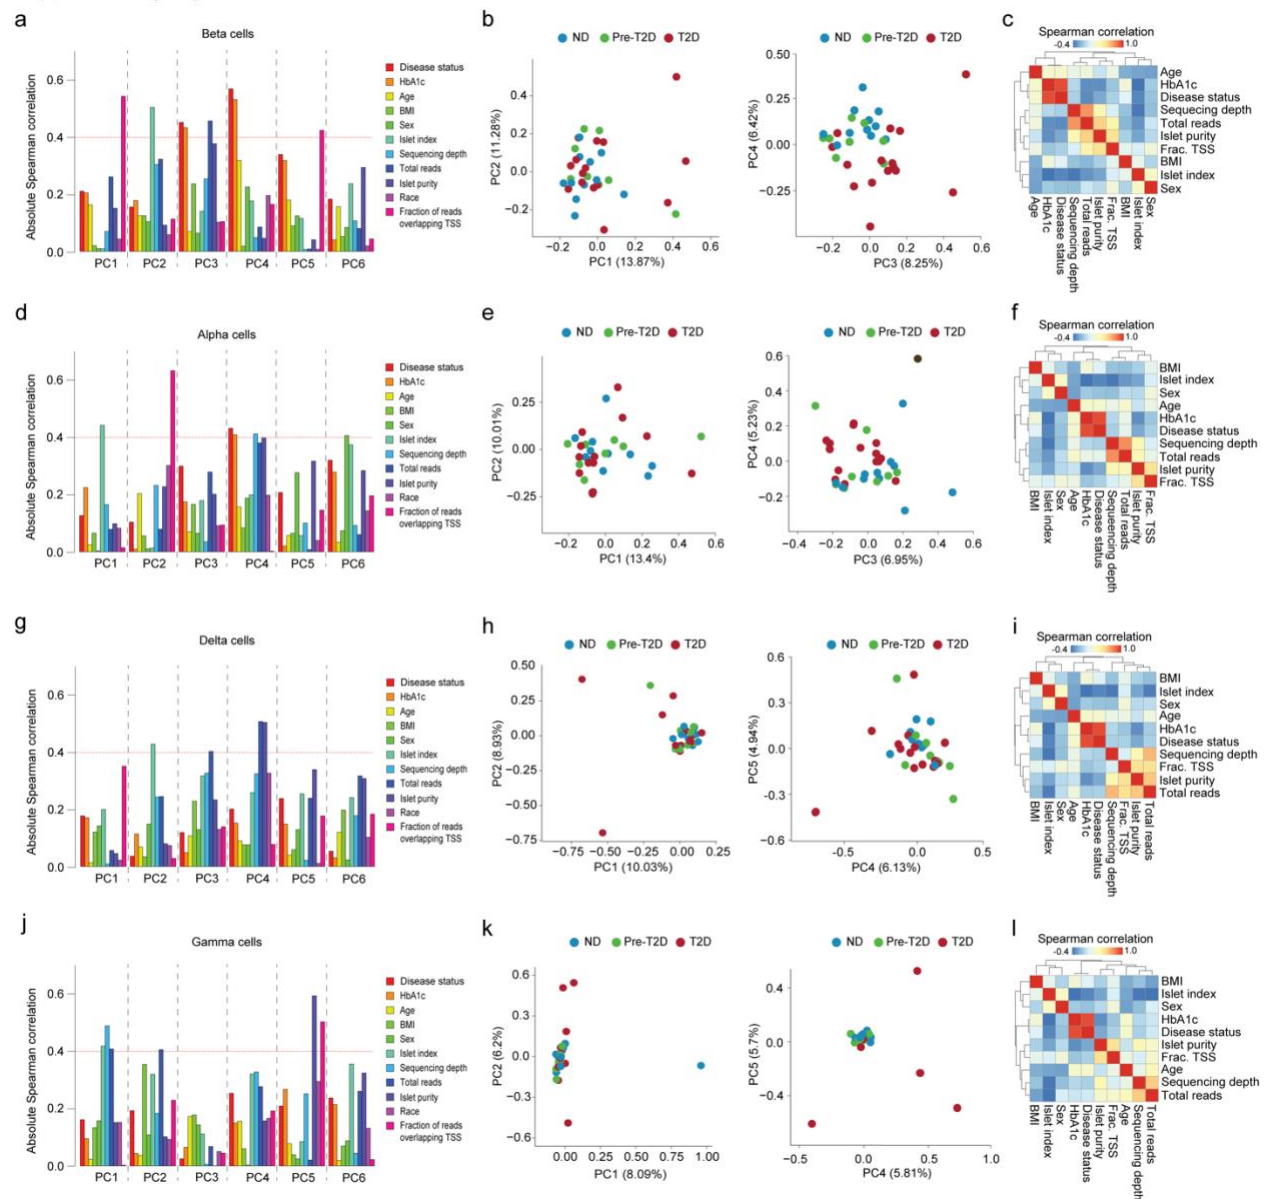

1345

1346 **Supplementary Figure 2. Identification of factors explaining donor variability in**  
 1347 **snATAC-seq data.**

1348 **(a,d,g,j)** Absolute Spearman correlation coefficient between the first 6 principle  
 1349 components (PCs) and each biological or technical variable in beta (a), alpha (d), delta  
 1350 (g), and gamma (j) cells. An absolute Spearman correlation threshold of 0.4 was used to  
 1351 identify factors having a high correlation with each PC. **(b,e,h,k)** Principal component  
 1352 analysis (PCA) based on cCREs in beta (b), alpha (e), delta (h), and gamma (k) cells from  
 1353 individual non-diabetic (ND,  $n=11$ ), pre-diabetic (pre-T2D,  $n=8$ ), and type 2 diabetic (T2D,  
 1354  $n=15$ ) donors which are color-coded by disease status. Each donor in the space is defined  
 1355 by the first two principal components (left) and the two principal components (right) that  
 1356 show highest correlation with disease status. **(c,f,i,l)** Pairwise Spearman correlation  
 1357 coefficients between biological or technical variables in beta (c), alpha (f), delta (i), and  
 1358 gamma (l) cells.

Supplementary Figure 3

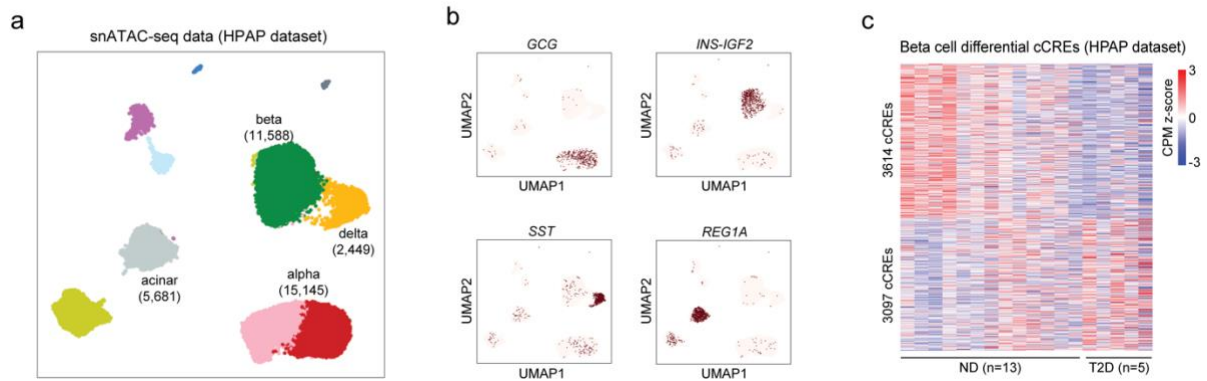

1359

1360 **Supplementary Figure 3. Validation of beta cell T2D-differential cCREs in snATAC-**  
1361 **seq data from an independent cohort of donor islets.**

1362 **(a)** Clustering of chromatin accessibility profiles from HPAP human islet snATAC-seq data  
1363 (non-diabetic (ND),  $n=13$ ; pre-T2D,  $n=2$ ; T2D,  $n=5$ ). Cells are plotted using the first two  
1364 UMAP components. Clusters are assigned cell type identities based on promoter  
1365 accessibility of known marker genes (see Supplementary Figure 3b). The number of cells  
1366 for each cell type cluster is shown in parentheses. **(b)** Promoter chromatin accessibility in  
1367 a 5 kb window around TSS for selected endocrine and non-endocrine marker genes for  
1368 each profiled cell (alpha: *GCG*, beta: *INS-IGF2*, delta: *SST*, acinar: *REG1A*). Total counts  
1369 normalization and log-transformation were applied. **(c)** Heatmap showing chromatin  
1370 accessibility at differential cCREs identified in Figure 1e in HPAP snATAC-seq data.  
1371 Columns represent beta cells from each donor (ND,  $n=13$ ; T2D,  $n=5$ ) and all ND and T2D  
1372 donors with accessibility of peaks normalized by CPM (counts per million).

## Supplementary Figure 4

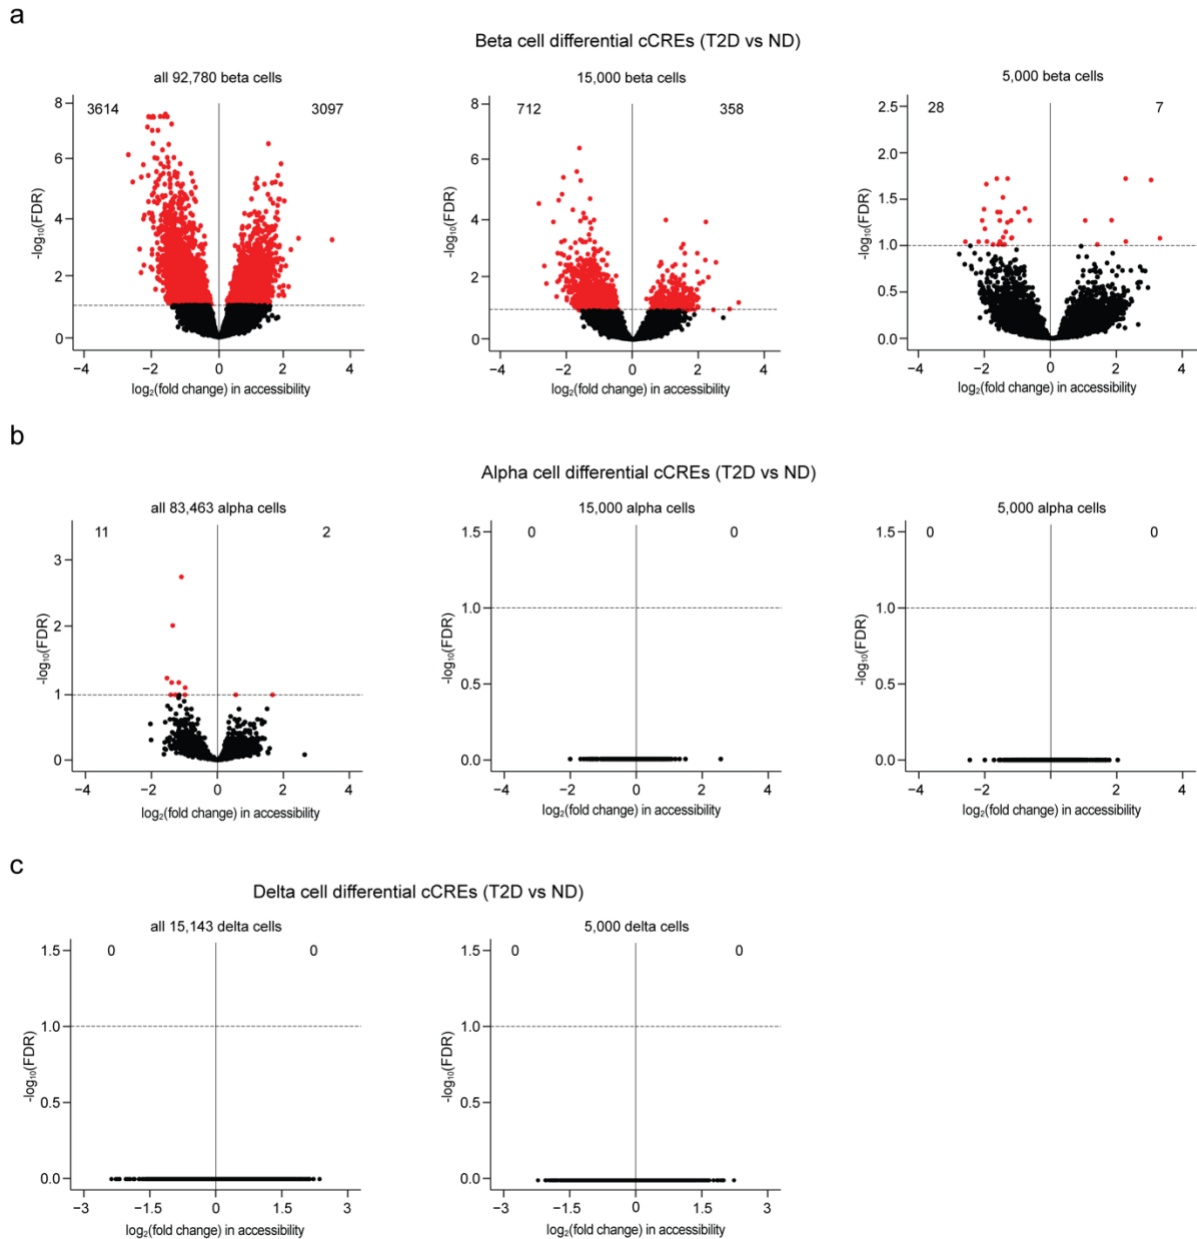

1373

1374

1375 **Supplementary Figure 4. T2D affects chromatin activity more profoundly in beta**  
1376 **cells than in other endocrine cell types.**

1377 **(a)** Volcano plot showing differential cCREs in beta cells between type 2 diabetic (T2D)  
1378 and non-diabetic (ND) donors. Panels show all beta cells (left), beta cells down-sampled  
1379 to 15,000 (middle), and 5,000 cells (right). Each dot represents a cCRE. cCREs with FDR  
1380 < .1 after Benjamini-Hochberg correction (red dots) were considered differentially  
1381 accessible. **(b)** Volcano plot showing differential cCREs in alpha cells between T2D and  
1382 ND donors. Panels show all alpha cells (left), alpha cells down-sampled to 15,000  
1383 (middle), and 5,000 cells (right). Each dot represents a chromatin accessible cCRE.  
1384 cCREs with FDR < .1 after Benjamini-Hochberg correction (red dots) were considered

1385 differentially accessible. **(c)** Volcano plot showing differential cCREs in delta cells  
1386 between T2D and ND donors. Panels show all delta cells (left) and delta cells down-  
1387 sampled to 5,000 cells (right). Each dot represents a chromatin accessible cCRE. cCREs  
1388 with  $FDR < .1$  after Benjamini-Hochberg correction (red dots) were considered  
1389 differentially accessible.



Supplementary Figure 5

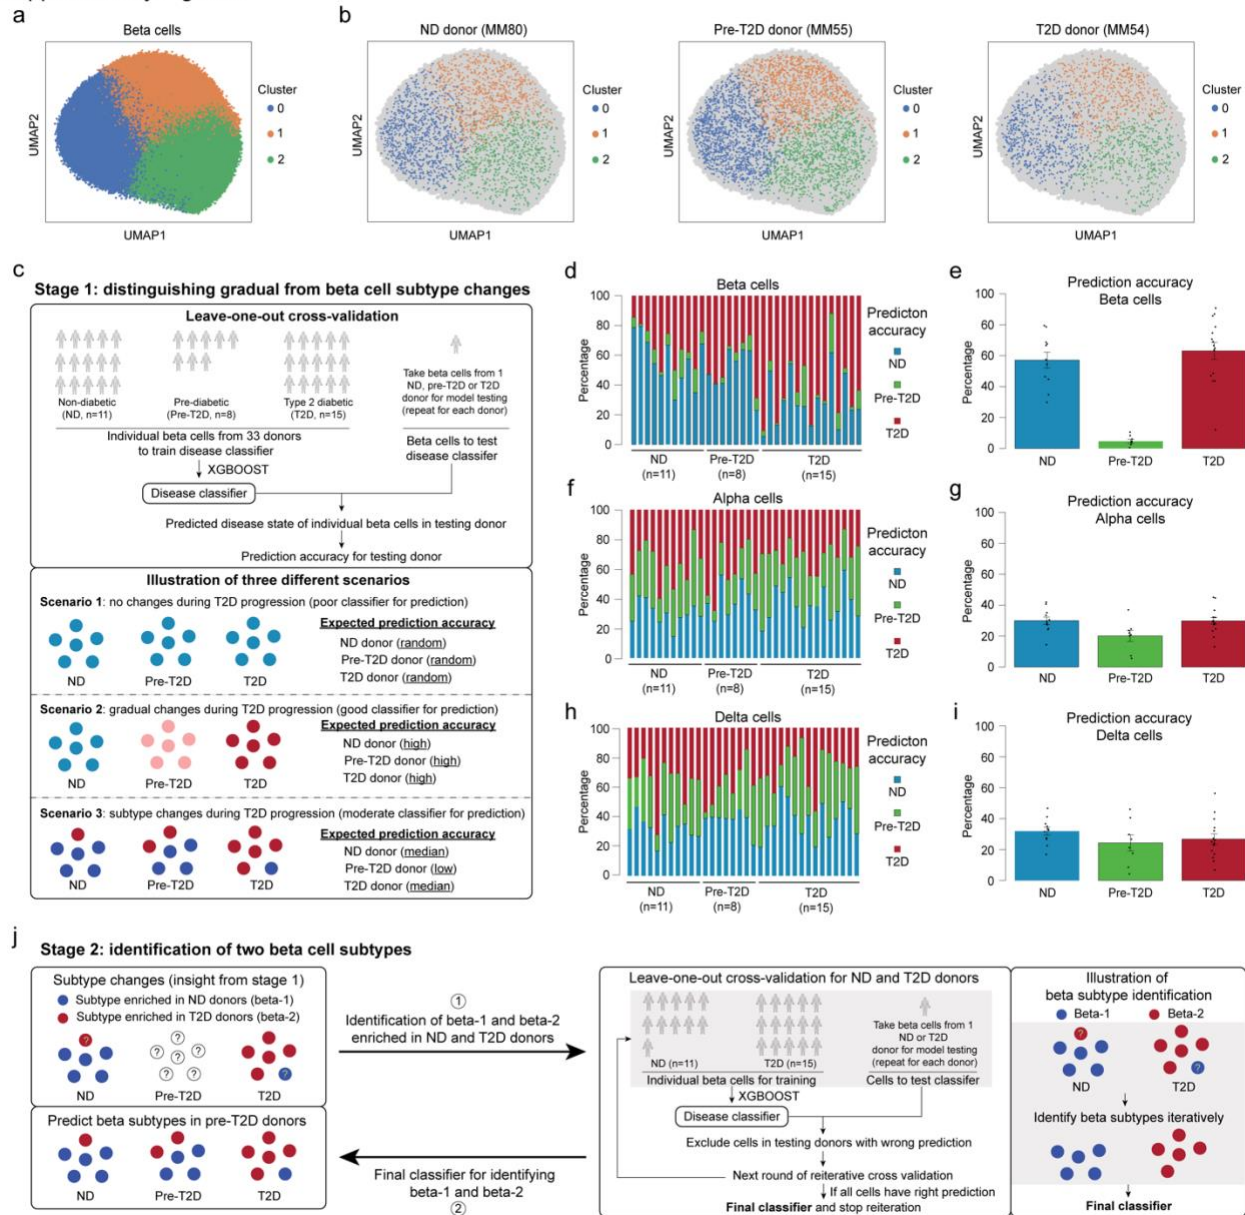

1390

1391

1392

**Supplementary Figure 5. Machine learning uncovers two beta cell subtypes.**

1393 **(a)** Clustering of chromatin accessibility profiles from 92,780 beta cells from non-diabetic  
 1394 (ND), prediabetic (pre-T2D) and type 2 diabetic (T2D) donor islets using Scanpy  
 1395 (resolution=0.5). Cells are plotted using the first two UMAP components. **(b)** Position of  
 1396 beta cells from representative ND (MM80), pre-T2D (MM55), and T2D (MM54) donors on  
 1397 the UMAP in panel a. **(c)** Illustration of process for distinguishing gradual from subtype  
 1398 changes in beta cells using machine learning. Possible scenarios for cell changes during  
 1399 T2D progression and expected disease state prediction accuracies for each scenario. In  
 1400 the case of no T2D-associated changes, the prediction accuracy for each disease state  
 1401 would be random (scenario 1), gradual cell state changes would be reflected by high  
 1402 prediction accuracy in each disease state (scenario 2), and subtype changes would be

1403 reflected by median prediction accuracies (scenario 3, here shown for two cell subtypes).  
1404 **(d, f, h)** Relative abundance of predicted disease state among beta (d), alpha (f), and  
1405 delta (h) cells from each donor using XGBOOST. Each column represents cells from one  
1406 donor. **(e, g, i)** Relative abundance of predicted disease state among beta (e), alpha (g),  
1407 and delta (i) cells in ND, pre-T2D and T2D donor islets. Data are shown as mean  $\pm$  S.E.M.  
1408 ( $n = 11$  ND,  $n = 8$  pre-T2D,  $n = 15$  T2D donors), dots denote data points from individual  
1409 donors. **(j)** Illustration of process for identifying a classifier capable of distinguishing the  
1410 two beta cell subtypes.



Supplementary Figure 6

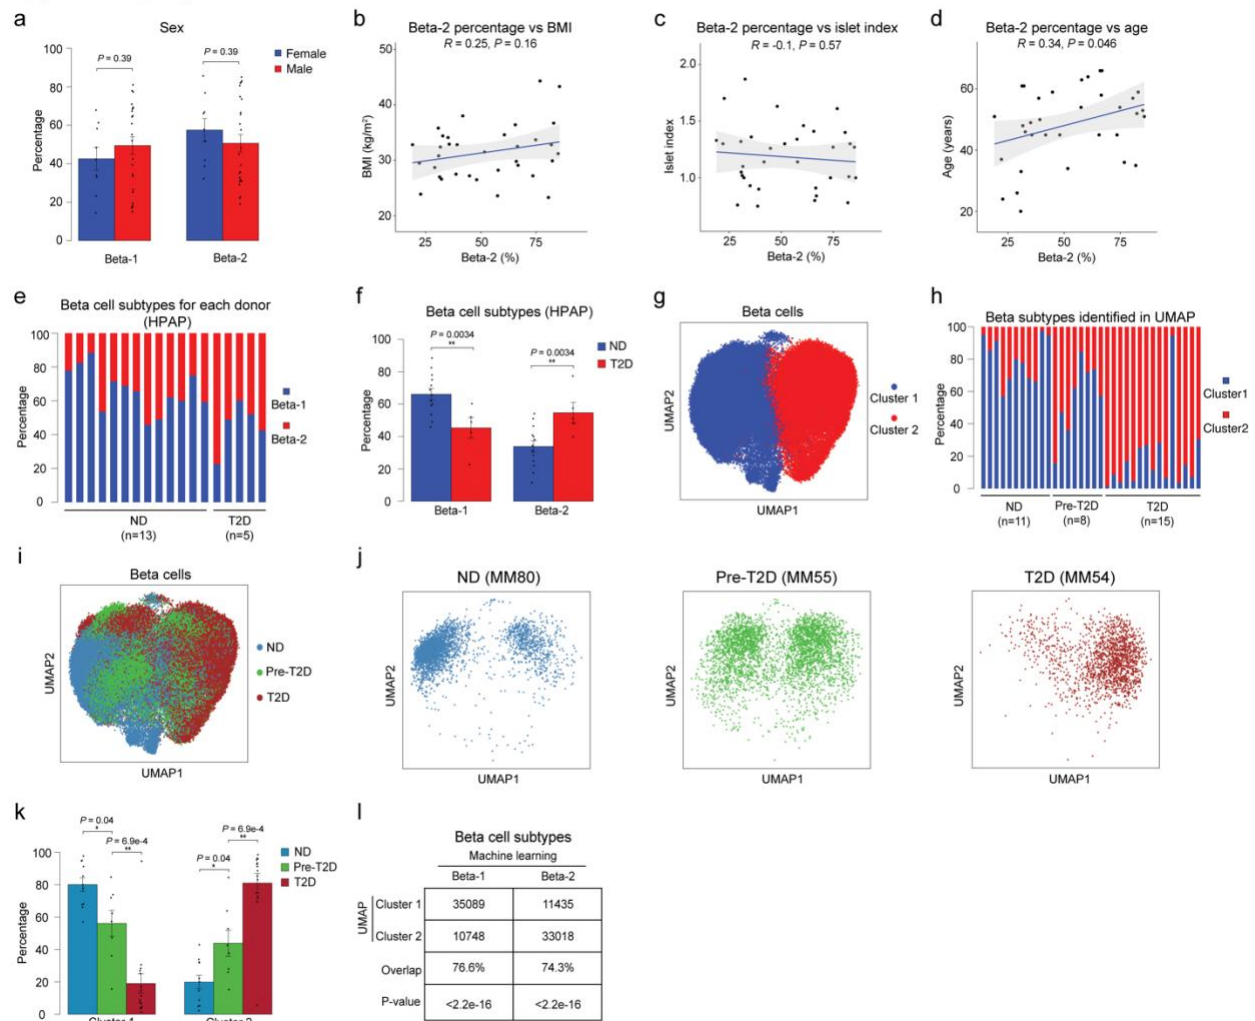

1411

1412

1413 **Supplementary Figure 6. Validation of beta cell subtypes using independent data**  
 1414 **and computational methods.**

1415 **(a)** Relative abundance of beta-1 and beta-2 cells in male and female donor islets. Data  
 1416 are shown as mean  $\pm$  S.E.M. ( $n = 9$  females,  $n = 25$  males), dots denote data points from  
 1417 individual donors. ANOVA test with age, disease, BMI, and islet index as covariates. **(b)**  
 1418 Pearson correlation between relative abundance of beta-2 cells and BMI across donors  
 1419 ( $n = 11$  ND,  $n = 8$  pre-T2D,  $n = 15$  T2D donors). **(c)** Pearson correlation between relative  
 1420 abundance of beta-2 cells and islet index across donors. **(d)** Pearson correlation between  
 1421 relative abundance of beta-2 cells and age across donors. **(e)** Relative abundance of  
 1422 beta-1 and beta-2 cells in islet snATAC-seq data from an independent cohort ( $n = 13$  ND,  
 1423  $n = 5$  T2D donors). Each column represents cells from one donor. **(f)** Relative abundance  
 1424 of each beta cell subtype in ND and T2D donor islets. Data are shown as mean  $\pm$  S.E.M  
 1425 ( $n = 13$  ND,  $n = 5$  T2D donors).  $**P < .01$ ; ANOVA test with age, sex, and BMI as  
 1426 covariates. **(g)** Clustering of chromatin accessibility profiles from 92,780 beta cells from  
 1427 ND, pre-T2D and T2D donors using beta cell differential cCREs between ND and T2D  
 1428 donors from Figure 1e. Cells are plotted using the first two UMAP components. **(h)**

1429 Relative abundance of each beta cell cluster based on UMAP annotation in panel g. Each  
1430 column represents cells from one donor. **(i)** Position of beta cells from ND, pre-T2D and  
1431 T2D donors on the UMPA in panel g. **(j)** Position of beta cells from representative ND  
1432 (MM80), pre-T2D (MM55) and T2D (MM54) donors on the UMPA in panel g. **(k)** Relative  
1433 abundance of each beta cell cluster in ND, pre-T2D and T2D donor islets. Data are shown  
1434 as mean  $\pm$  S.E.M. ( $n = 11$  ND,  $n = 8$  pre-T2D,  $n = 15$  T2D donors).  $**P < .01$ ,  $*P < .05$ ;  
1435 ANOVA test with age, sex, BMI, and islet index as covariates. **(l)** Overlap between beta  
1436 cell subtypes identified using machine learning and beta cell clusters from UMPA in panel  
1437 g. The overlap is 76.6% between cluster 1 and beta-1 and 74.3% between cluster 2 and  
1438 beta-2.  $P < 2.2e-16$  (Binominal test).

Supplementary Figure 7

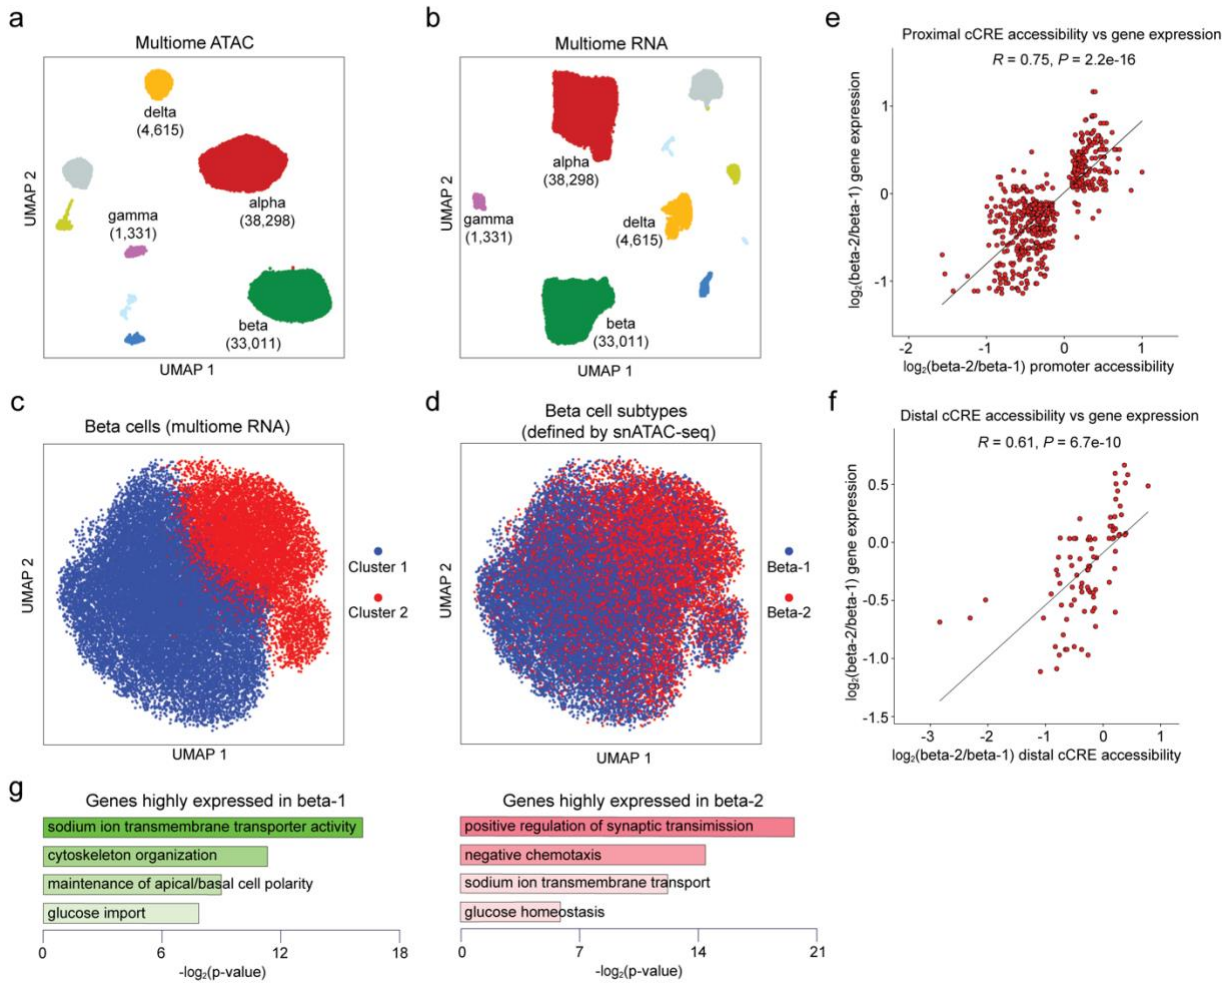

1439

1440

1441

1442

1443

1444

1445

1446

1447

1448

1449

1450

1451

1452

1453

1454

1455

1456

1457

**Supplementary Figure 7. Validation and characterization of beta cell subtypes using multiome data.**

**(a)** Clustering of chromatin accessibility profiles of cells from multiome data ( $n = 6$  ND,  $n = 8$  pre-T2D,  $n = 6$  T2D). Cells are plotted using the first two UMAP components. Clusters are assigned cell type identities based on promoter accessibility of known marker genes (alpha: *GCG*, beta: *INS-IGF2*, delta: *SST*, gamma: *PPY*). The number of cells for each cell type cluster is shown in parentheses. **(b)** Clustering of gene expression profiles of cells from multiome data ( $n = 6$  ND,  $n = 8$  pre-T2D,  $n = 6$  T2D). Cells are plotted using the first two UMAP components. Clusters are assigned cell type identities based on expression levels of known marker genes (alpha: *GCG*, beta: *INS*, delta: *SST*, gamma: *PPY*). The number of cells for each cell type cluster is shown in parentheses. **(c)** Clustering of gene expression profiles of beta cells from multiome data using genes linked to differential proximal (within  $\pm 5$ kb of a TSS in GENCODE V19) and distal (based on potential distal cCRE-promoter connections inferred from cicero, see Methods) cCREs between ND and T2D beta cells from Figure 1e. Cells are plotted using the first two UMAP components. **(d)** Plots of beta cell subtypes predicted from chromatin accessibility profiles of beta cells from multiome data by machine learning. **(e)** Correlation between changes

1458 in proximal cCRE (within  $\pm$  5kb of a TSS in GENCODE V19) accessibility and gene  
1459 expression differences between beta-1 and beta-2 cells for differentially expressed genes  
1460 from Figure 3b. There are 544 proximal cCREs and target gene pairs in total, of which  
1461 511 have consistent changes between proximal cCRE accessibility and gene expression.  
1462 **(f)** Correlation between changes in distal cCRE (potential distal cCRE-promoter  
1463 connections inferred from cicero, see Methods) accessibility and gene expression  
1464 differences between beta-1 and beta-2 cells for differentially expressed genes from Figure  
1465 3b. There are 85 distal cCREs and target gene pairs in total, of which 72 have consistent  
1466 changes between distal cCRE accessibility and gene expression. **(g)** Enriched gene  
1467 ontology terms among genes (see Figure 3b) with higher (proximal or distal) cCRE  
1468 accessibility and expression in beta-1 compared to beta-2 cells (left) and higher (proximal  
1469 or distal) cCRE accessibility and expression in beta-2 compared to beta-1 cells (right).

Supplementary Figure 8

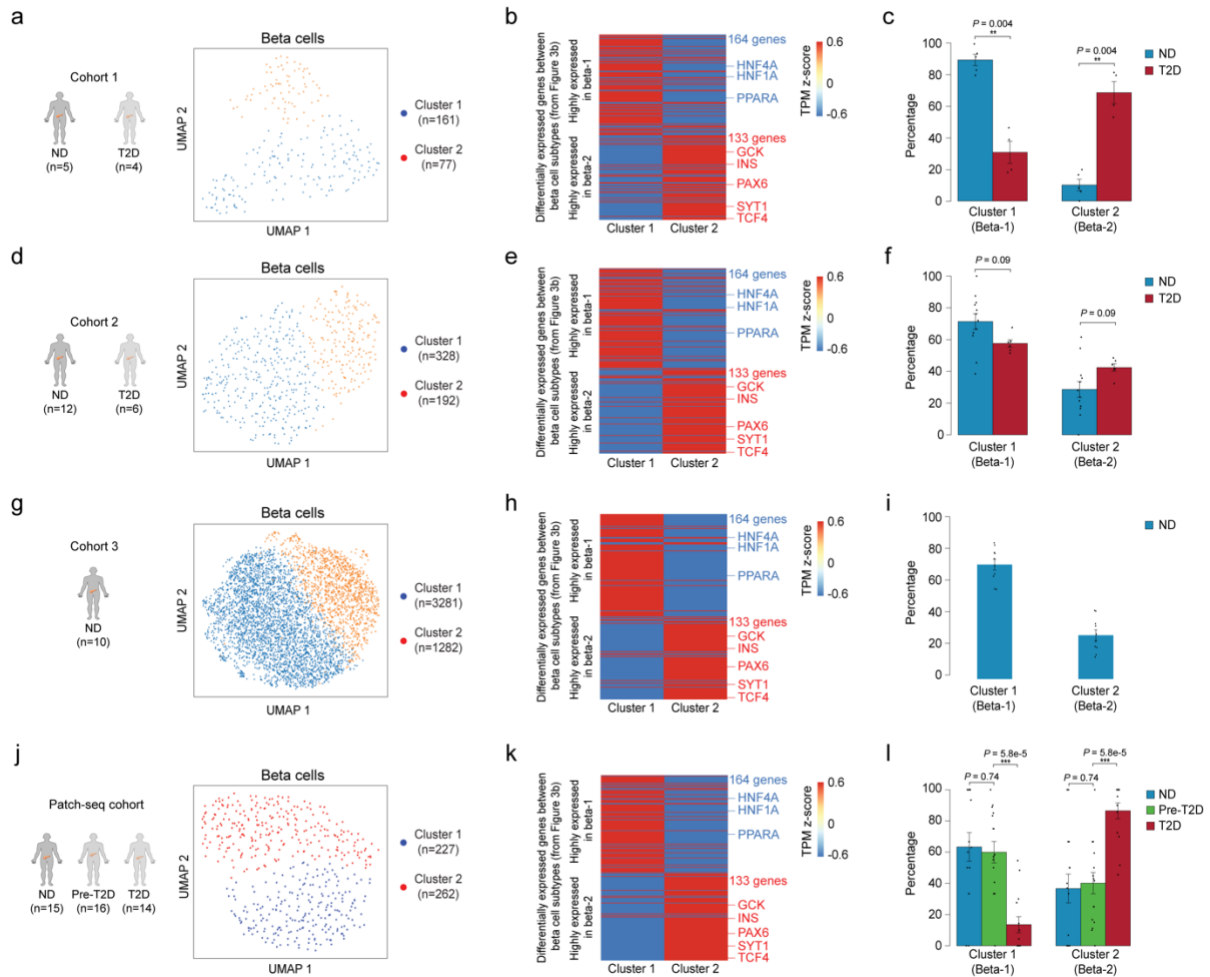

1470

1471

1472 **Supplementary Figure 8. Beta-1 and beta-2 cell classification analysis in scRNA-**  
 1473 **seq data from independent cohorts.**

1474 **(a, d, g, j)** Clustering of gene expression profiles of beta cells from cohort 1<sup>5</sup>, cohort 2<sup>12</sup>,  
 1475 cohort 3<sup>22</sup>, and Patch-seq cohort using differentially expressed genes between beta-1  
 1476 and beta-2 from Figure 3b. Cells are plotted using the first two UMAP components. The  
 1477 number of donors for each cohort and cells for each cell cluster is shown in parentheses.  
 1478 **(b, e, h, k)** Heatmap showing pseudo-bulk expression levels of differentially expressed  
 1479 genes between beta-1 and beta-2 (see Figure 3b) in beta cells from cluster 1 and cluster  
 1480 2 of cohort 1<sup>5</sup>, cohort 2<sup>12</sup>, cohort 3<sup>22</sup>, and Patch-seq cohort. Expression levels of genes  
 1481 are normalized by TPM (transcripts per million). **(c, f, i, l)** Relative abundance of each  
 1482 beta cell subtype in ND and T2D donor islets in cohort 1<sup>5</sup>, cohort 2<sup>12</sup>, cohort 3<sup>22</sup>, and  
 1483 Patch-seq cohort. Data are shown as mean ± S.E.M., dots denote data points from  
 1484 individual donors. \*\* $P < .01$ , \*\*\* $P < .001$ ; ANOVA test with age, sex, and BMI as  
 1485 covariates.



Supplementary Figure 9

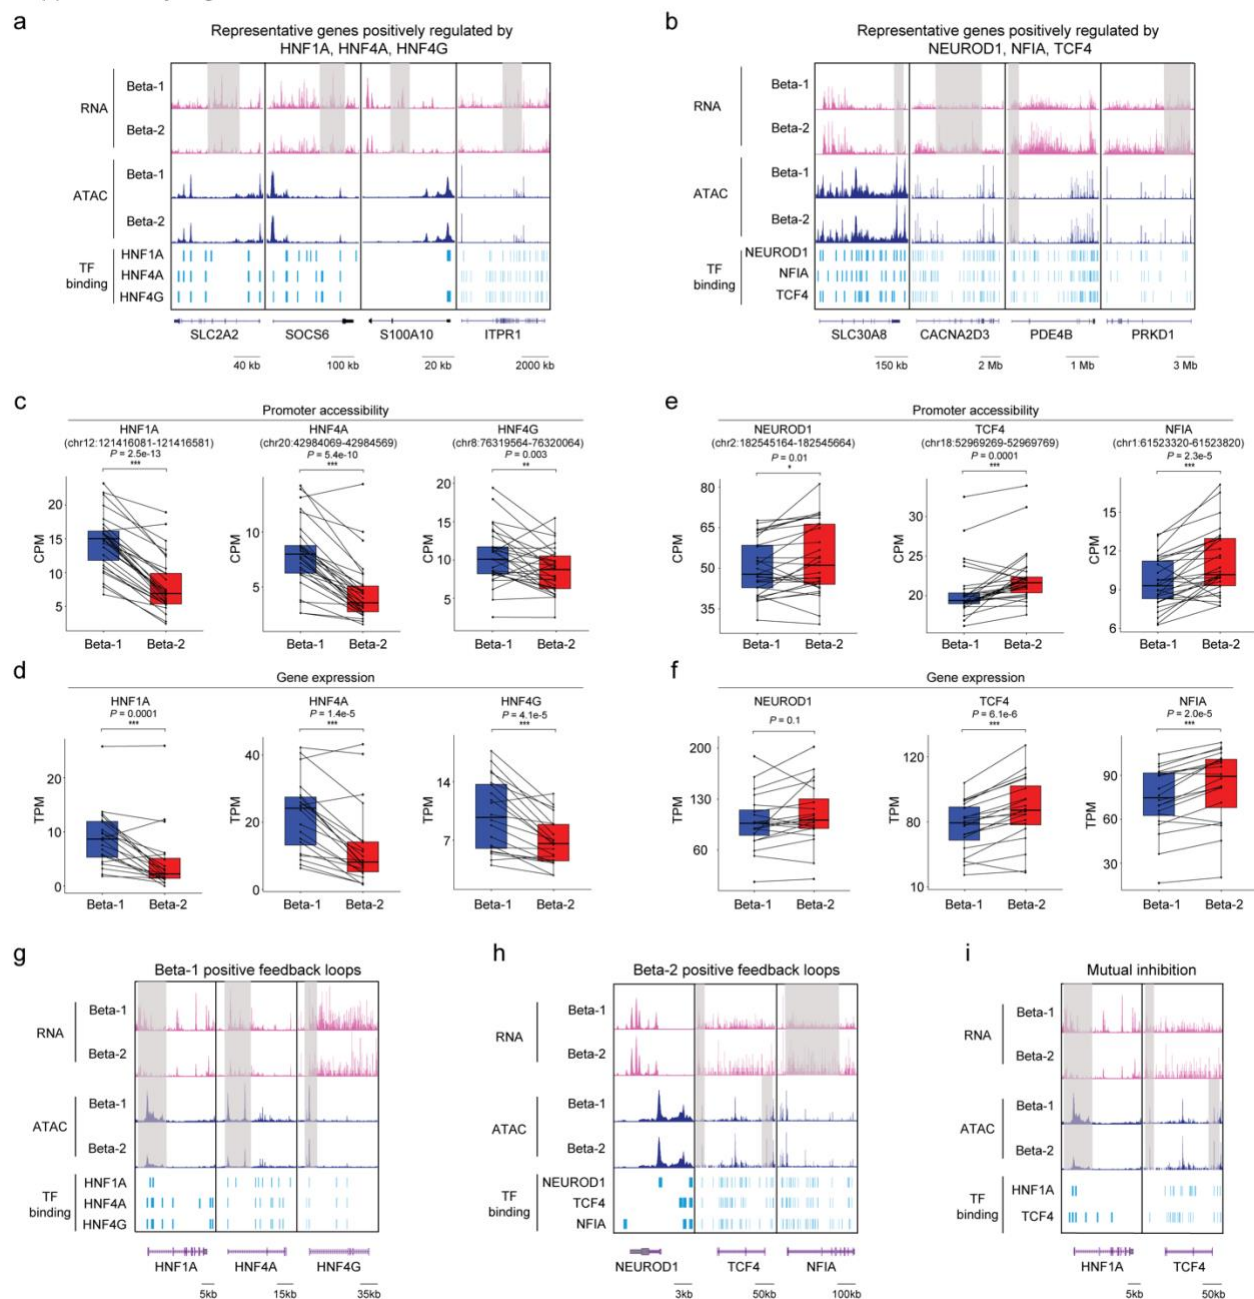

1486

1487

1488

1489

**Supplementary Figure 9. Transcriptional programs distinguishing the two beta cell subtypes.**

1490 **(a)** Genome browser tracks showing aggregate RNA and ATAC read density at  
 1491 representative genes (*SLC2A2*, *SOCS6*, *S100A10*, *ITPR1*) positively regulated by  
 1492 HNF1A, HNF4A or HNF4G. Differential regions between beta-1 and beta-2 are indicated  
 1493 by grey shaded boxes. Beta cell cCREs with binding sites for HNF1A, HNF4A and HNF4G  
 1494 are shown. All tracks are scaled to uniform  $1 \times 10^6$  read depth. **(b)** Genome browser tracks  
 1495 showing aggregate RNA and ATAC read density at representative genes (*SLC30A8*,  
 1496 *CACNA2D3*, *PDE4B*, *PRKD1*) positively regulated by NEUROD1, NFIA or TCF4.



1497 Differential regions between beta-1 and beta-2 are indicated by grey shaded boxes. Beta  
1498 cell cCREs with binding sites for NEUROD1, NFIA and TCF4 are shown. All tracks are  
1499 scaled to uniform  $1 \times 10^6$  read depth. **(c)** Bar plots showing accessibility at *HNF1A*, *HNF4A*  
1500 and *HNF4G* proximal cCREs in beta-1 and beta-2 cells. Proximal region of *HNF1A*  
1501 (chr12:121416081-121416581), *HNF4A* (chr20:42984069-42984569), *HNF4G*  
1502 (chr8:76319564-76320064). Accessibility of peaks is normalized by CPM (counts per  
1503 million). Paired t-test. **(d)** Bar plots showing expression of *HNF1A*, *HNF4A* and *HNF4G*  
1504 in beta-1 and beta-2 cells. Gene expression is normalized by TPM (transcripts per  
1505 million). Paired t-test. **(e)** Bar plots showing accessibility at *NEUROD1*, *NFIA* and *TCF4*  
1506 proximal cCREs in beta-1 and beta-2 cells. Proximal region of *NEUROD1*  
1507 (chr2:182545164-182545664), *NFIA* (chr1:61523320-61523820), *TCF4*  
1508 (chr18:52969269-52969769). Accessibility of peaks is normalized by CPM. Paired t-test.  
1509 **(f)** Bar plots showing expression of *NEUROD1*, *NFIA*, and *TCF4* in beta-1 and beta-2.  
1510 Gene expression is normalized by TPM. Paired t-test. **(g)** Genome browser tracks  
1511 showing aggregate RNA and ATAC read density at *HNF1A*, *HNF4A* and *HNF4G* in beta-  
1512 1 and beta-2 cells. Differential regions between beta-1 and beta-2 are indicated by grey  
1513 shaded boxes. Beta cell cCREs with binding sites for HNF1A, HNF4A and HNF4G are  
1514 shown. All tracks are scaled to uniform  $1 \times 10^6$  read depth. **(h)** Genome browser tracks  
1515 showing aggregate RNA and ATAC read density at *NEUROD1*, *NFIA* and *TCF4* in beta-  
1516 1 and beta-2 cells. Differential regions between beta-1 and beta-2 are indicated by grey  
1517 shaded boxes. Beta cell cCREs with binding sites for NEUROD1, NFIA and TCF4 are  
1518 shown. All tracks are scaled to uniform  $1 \times 10^6$  read depth. **(i)** Genome browser tracks  
1519 showing aggregate RNA and ATAC read density at *HNF1A* and *TCF4* in beta-1 and beta-  
1520 2 cells. Differential regions between beta-1 and beta-2 cells are indicated by grey shaded  
1521 boxes. Beta cell cCREs with binding sites for HNF1A and TCF4 are shown. All tracks are  
1522 scaled to uniform  $1 \times 10^6$  read depth.

Supplementary Figure 10

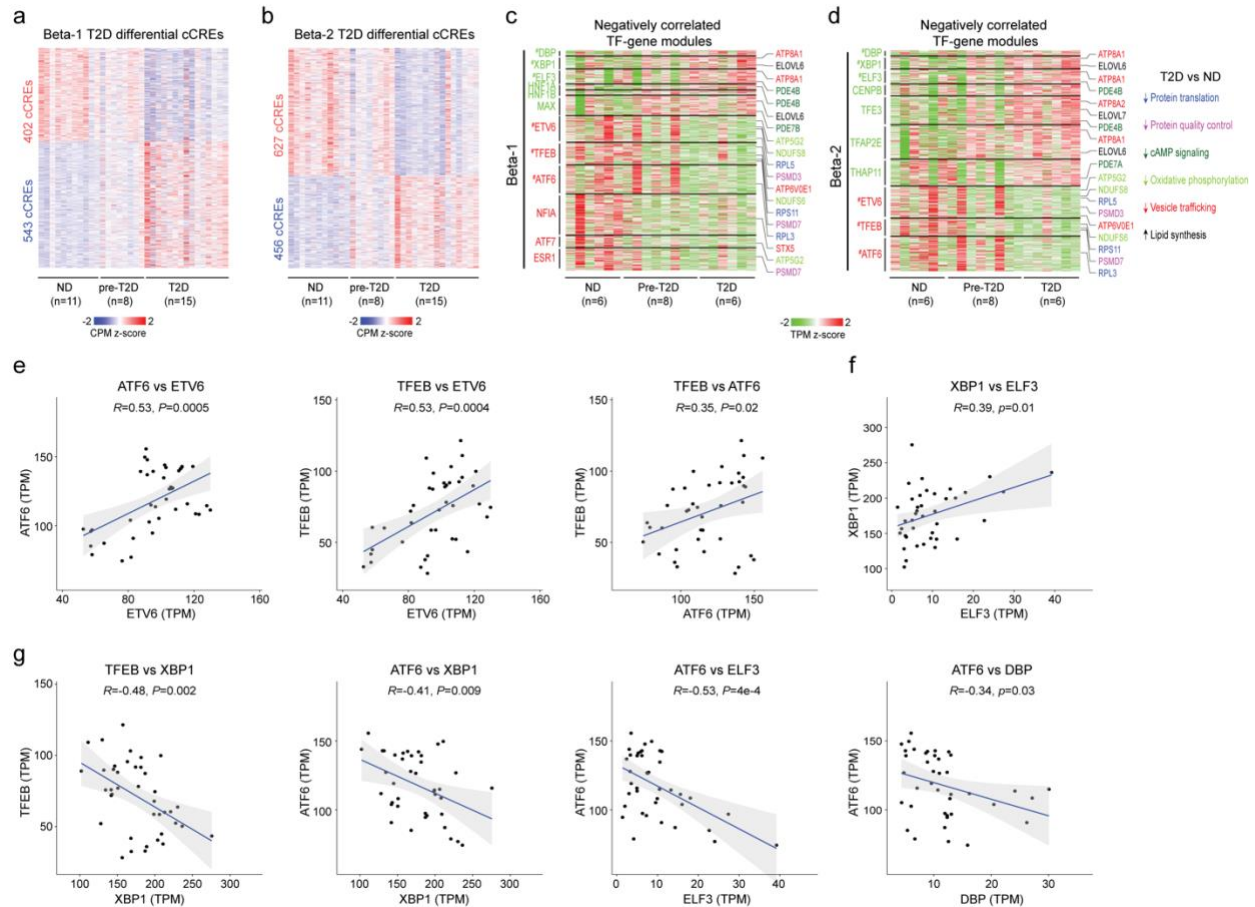

1523

1524

1525 **Supplementary Figure 10. Transcriptional programs changed in both beta cell**  
1526 **subtypes in T2D.**

1527 **(a)** Heatmap showing chromatin accessibility at cCREs with differential accessibility in  
1528 beta-1 cells from ND and T2D donors. Columns represent beta cells from each donor  
1529 (ND,  $n=11$ ; pre-diabetic, pre-T2D,  $n=8$ ; T2D,  $n=15$ ) with accessibility of peaks normalized  
1530 by CPM (counts per million). **(b)** Heatmap showing chromatin accessibility at cCREs with  
1531 differential accessibility in beta-2 cells from ND and T2D donors. Columns represent beta  
1532 cells from each donor (ND,  $n=11$ ; pre-diabetic, pre-T2D,  $n=8$ ; T2D,  $n=15$ ) with  
1533 accessibility of peaks normalized by CPM. **(c)** Heatmap showing expression of genes  
1534 negatively regulated by TFs (green) with higher activity in ND compared to T2D beta-1  
1535 cells (see Methods) and TFs (red) with lower activity in ND compared to T2D beta-1 cells  
1536 ( $n=6$  ND,  $n=8$  pre-T2D,  $n=6$  T2D donors). Representative target genes of individual TFs  
1537 are highlighted and classified by biological processes. Gene expression is normalized by  
1538 TPM (transcripts per million). # denotes TFs with decreased or increased expression in  
1539 T2D in both beta-1 and beta-2 cells. **(d)** Heatmap showing expression of genes negatively  
1540 regulated by TFs (green) with higher activity in ND compared to T2D beta-2 cells (see  
1541 Methods) and TFs (red) with lower activity in ND compared to T2D beta-2 cells ( $n=6$  ND,  
1542  $n=8$  pre-T2D,  $n=6$  T2D donors). Representative target genes of individual TFs are  
1543 highlighted and classified by biological processes. Gene expression is normalized by

1544 TPM (transcripts per million). # denotes TFs with decreased or increased expression in  
1545 T2D in both beta-1 and beta-2 cells. **(e,f,g)** Pearson correlation of expression levels  
1546 between indicated TFs across pseudo-bulk RNA profiles from each beta cell subtype (40  
1547 dots in total: 20 donors including  $n = 6$  ND,  $n = 8$  pre-T2D,  $n = 6$  T2D).

## Supplementary Figure 11

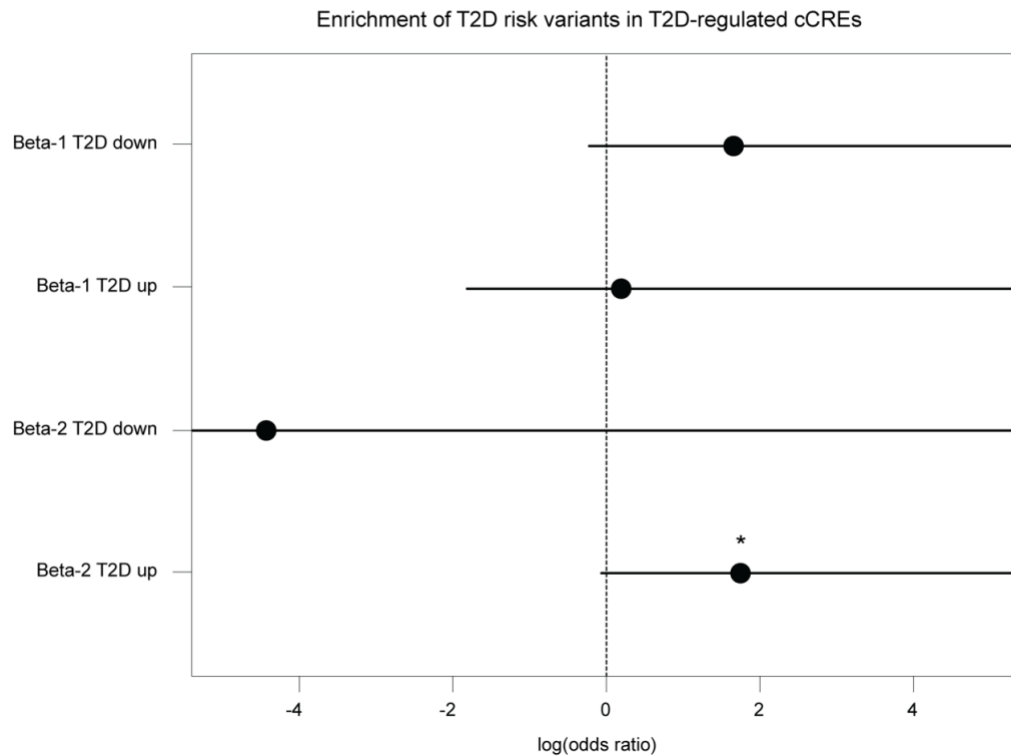

1548

1549 **Supplementary Figure 11. T2D risk variant enrichment for cCREs with T2D-**  
1550 **dependent changes in the beta-1 and beta-2 subtype.**

1551 Enrichment of fine-mapped T2D risk variants for cCREs active in the beta-1 and beta-2  
1552 subtype with increased or decreased activity in T2D. Values represent log odds ratios  
1553 and 95% confidence intervals. \*  $P < .05$
